# Supplementary material for: Necroptosis increases with age and is reduced by dietary restriction
Source: PubMed Central journal article supplement (PMC6052392; doi:10.1111/acel.12770), 2018-04-25
Supplement: ACEL-17-na-s001.pdf [file ACEL-17-na-s001.pdf]

**Supplementary Table I. Changes in cytokine/chemokine gene expression in adult, old and old-DR eWAT and iWAT**

| eWAT     |                                 |             |      |                      |      |                      |      |              |                 |               |
|----------|---------------------------------|-------------|------|----------------------|------|----------------------|------|--------------|-----------------|---------------|
|          |                                 | Young       |      | Old                  |      | Old-DR               |      | Significance | Significance    | Significance  |
| Gene     | Gene Name                       | Fold change | SEM  | Fold change vs young | SEM  | Fold change vs young | SEM  | Young vs Old | Young vs Old-DR | Old vs Old-DR |
| Pf4      | Platelet Factor 4               | 1           | 0.12 | 6.95                 | 0.66 | 2.35                 | 0.66 | Yes          | No              | Yes           |
| Il16     | Interleukin 16                  | 1           | 0.19 | 6.01                 | 0.78 | 2.11                 | 0.22 | Yes          | Yes             | Yes           |
| Tnf      | Tumor Necrosis Factor           | 1           | 0.16 | 4.66                 | 0.78 | 2.02                 | 0.09 | Yes          | Yes             | Yes           |
| Il5      | Interleukin 5                   | 1           | 0.19 | 4.40                 | 0.64 | 1.56                 | 0.28 | Yes          | No              | Yes           |
| Il6      | Interleukin 6                   | 1           | 0.23 | 3.93                 | 0.51 | 1.81                 | 0.50 | No           | No              | No            |
| Il15     | Interleukin 15                  | 1           | 0.08 | 2.62                 | 0.24 | 1.69                 | 0.50 | Yes          | Yes             | Yes           |
| Tnfsf13b | TNF Superfamily Member 13b      | 1           | 0.12 | 2.54                 | 0.19 | 1.26                 | 0.41 | Yes          | No              | Yes           |
| Il7      | Interleukin 7                   | 1           | 0.27 | 2.84                 | 0.64 | 1.68                 | 0.47 | Yes          | No              | No            |
| Il1a     | Interleukin 1alpha              | 1           | 0.12 | 2.86                 | 0.43 | 1.54                 | 0.46 | Yes          | No              | No            |
| Ccl11    | C-C Motif Chemokine Ligand 11   | 1           | 0.32 | 5.11                 | 0.28 | 1.30                 | 0.37 | Yes          | Yes             | Yes           |
| Ccl24    | C-C Motif Chemokine Ligand 24   | 1           | 0.25 | 5.96                 | 0.22 | 0.88                 | 0.34 | Yes          | No              | Yes           |
| Il1b     | Interleukin 1beta               | 1           | 0.14 | 5.05                 | 1.35 | 0.99                 | 0.31 | Yes          | No              | Yes           |
| Ccl22    | C-C Motif Chemokine Ligand 22   | 1           | 0.30 | 7.78                 | 0.40 | 0.76                 | 0.15 | Yes          | No              | Yes           |
| Cxcl11   | C-X-C Motif Chemokine Ligand 11 | 1           | 0.35 | 6.23                 | 1.17 | 1.09                 | 0.22 | Yes          | No              | Yes           |
| Ppbp     | Pro-Platelet Basic Protein      | 1           | 0.37 | 4.01                 | 0.42 | 1.00                 | 0.32 | Yes          | No              | Yes           |
| Tnfsf11  | TNF Superfamily Member 11       | 1           | 0.35 | 4.18                 | 0.47 | 0.96                 | 0.31 | Yes          | No              | Yes           |
| Ccl7     | C-C Motif Chemokine Ligand 7    | 1           | 0.22 | 2.69                 | 0.10 | 0.80                 | 0.09 | Yes          | No              | Yes           |
| Csf1     | Colony Stimulating Factor 1     | 1           | 0.30 | 1.80                 | 0.03 | 0.90                 | 0.05 | Yes          | No              | Yes           |
| Ccl2     | C-C Motif Chemokine Ligand 2    | 1           | 0.30 | 2.75                 | 0.06 | 0.72                 | 0.22 | Yes          | No              | Yes           |

|           |                                      |   |      |      |      |      |      |     |     |     |
|-----------|--------------------------------------|---|------|------|------|------|------|-----|-----|-----|
| Ccl19     | C-C Motif Chemokine Ligand 19        | 1 | 0.34 | 2.16 | 0.23 | 0.92 | 0.28 | Yes | No  | Yes |
| Il12a     | Interleukin 12a                      | 1 | 0.19 | 1.97 | 0.59 | 0.86 | 0.22 | No  | No  | No  |
| Tnfsf10   | TNF Superfamily Member 10            | 1 | 0.43 | 2.23 | 0.25 | 0.56 | 0.06 | Yes | No  | Yes |
| Cxcl9     | C-X-C Motif Chemokine Ligand 9       | 1 | 0.48 | 1.71 | 0.23 | 0.78 | 0.21 | No  | No  | Yes |
| Il4       | Interleukin 4                        | 1 | 0.43 | 6.18 | 0.40 | 1.56 | 1.05 | Yes | No  | Yes |
| Il13      | Interleukin 13                       | 1 | 0.34 | 1.55 | 0.49 | 0.34 | 0.17 | No  | No  | No  |
| Il17f     | Interleukin17f                       | 1 | 0.25 | 0.67 | 0.13 | 0.89 | 0.29 | No  | No  | No  |
| Il23a     | Interleukin 23a                      | 1 | 0.23 | 0.31 | 0.03 | 0.86 | 0.29 | Yes | No  | No  |
| Vgefa     | Vascular Endothelial Growth Factor A | 1 | 0.48 | 0.65 | 0.06 | 0.55 | 0.14 | No  | No  | No  |
| Thpo      | Thrombopoietin                       | 1 | 0.54 | 0.84 | 0.12 | 0.38 | 0.14 | No  | No  | Yes |
| Ccl4      | C-C Motif Chemokine Ligand4          | 1 | 0.18 | 2.13 | 0.56 | 4.55 | 2.87 | No  | Yes | No  |
| Ccl5      | C-C Motif Chemokine Ligand 5         | 1 | 0.20 | 2.14 | 0.26 | 3.05 | 1.89 | Yes | No  | No  |
| IL10      | Interleukin10                        | 1 | 0.33 | 1.84 | 0.38 | 4.17 | 2.91 | No  | No  | No  |
| Il18      | Interleukin 18                       | 1 | 0.25 | 2.82 | 0.66 | 2.00 | 0.66 | No  | No  | No  |
| Lif       | LIF, Interleukin 6 Family Cytokine   | 1 | 0.23 | 2.83 | 0.57 | 1.59 | 0.35 | Yes | No  | No  |
| Lta       | Lymphotoxin Alpha                    | 1 | 0.34 | 2.07 | 0.59 | 2.00 | 0.47 | No  | No  | No  |
| Tnfrsf11b | TNF Receptor Superfamily Member 11b  | 1 | 0.29 | 1.89 | 0.03 | 2.33 | 0.49 | Yes | No  | No  |
| Cxcl13    | C-X-C Motif Chemokine Ligand 13      | 1 | 0.43 | 1.14 | 0.19 | 1.66 | 0.36 | No  | No  | No  |
| Xcl1      | X-C Motif Chemokine Ligand 1         | 1 | 0.15 | 1.25 | 0.41 | 2.56 | 0.45 | No  | No  | No  |
| Cxcl10    | C-X-C Motif Chemokine Ligand 10      | 1 | 0.25 | 1.08 | 0.31 | 2.84 | 1.74 | No  | Yes | No  |
| Cxcl12    | C-X-C Motif Chemokine Ligand 12      | 1 | 0.22 | 1.36 | 0.05 | 1.78 | 0.59 | No  | No  | No  |
| Cd40lg    | CD40 Ligand                          | 1 | 0.28 | 0.96 | 0.12 | 1.94 | 0.70 | No  | No  | No  |
| Ltb       | Lymphotoxin Beta                     | 1 | 0.32 | 1.37 | 0.31 | 2.25 | 1.09 | No  | No  | No  |

|        |                                        |   |      |       |       |      |      |     |     |     |
|--------|----------------------------------------|---|------|-------|-------|------|------|-----|-----|-----|
| Mif    | Macrophage Migration Inhibitory Factor | 1 | 0.31 | 1.18  | 0.35  | 1.77 | 0.72 | No  | No  | No  |
| Ctfl   | Cardiotrophin 1                        | 1 | 0.19 | 0.95  | 0.34  | 1.79 | 0.44 | No  | No  | No  |
| Gpi1   | Glucose-6-Phosphate Isomerase 1        | 1 | 0.17 | 0.90  | 0.11  | 1.75 | 0.46 | No  | No  | No  |
| Cntf   | Ciliary Neurotrophic Factor            | 1 | 0.32 | 0.65  | 0.08  | 1.48 | 0.28 | No  | No  | Yes |
| Ccl12  | C-C Motif Chemokine Ligand 12          | 1 | 0.23 | 1.73  | 0.35  | 1.32 | 0.52 | No  | No  | No  |
| Cxcl1  | C-X-C Motif Chemokine Ligand 1         | 1 | 0.30 | 1.56  | 0.24  | 1.35 | 0.80 | No  | No  | No  |
| Fasl   | Fas Ligand                             | 1 | 0.37 | 1.45  | 0.46  | 0.83 | 0.32 | No  | No  | No  |
| Il27   | Interleukin 27                         | 1 | 0.38 | 1.00  | 0.22  | 1.33 | 0.53 | No  | No  | No  |
| Ifng   | Interferon Gamma                       | 1 | 0.31 | 1.31  | 0.37  | 1.29 | 0.94 | No  | No  | No  |
| Ccl3   | C-C Motif Chemokine Ligand 3           | 1 | 0.24 | 2.39  | 0.48  | 9.54 | 5.27 | Yes | No  | No  |
| Cxcl16 | C-X-C Motif Chemokine Ligand 16        | 1 | 0.38 | 1.91  | 0.35  | 3.89 | 1.95 | No  | No  | No  |
| Il11   | Interleukin 11                         | 1 | 0.21 | 1.66  | 0.67  | 2.86 | 1.22 | No  | No  | No  |
| Ccl17  | C-C Motif Chemokine Ligand 17          | 1 | 0.36 | 1.84  | 0.44  | 2.48 | 1.30 | No  | No  | No  |
| Tgfb2  | Transforming Growth Factor Beta 2      | 1 | 0.31 | 2.02  | 0.61  | 2.52 | 0.74 | No  | No  | No  |
| Mstn   | Myostatin                              | 1 | 0.25 | 1.66  | 0.54  | 6.25 | 4.12 | No  | No  | No  |
| Hc     | Hemolytic complement                   | 1 | 0.51 | 0.37  | 0.10  | 3.53 | 1.11 | No  | No  | No  |
| Cx3Cl1 | C-X3-C Motif Chemokine Ligand 1        | 1 | 0.33 | 0.67  | 0.31  | 1.76 | 0.57 | No  | No  | No  |
| ccl1   | C-C Motif Chemokine Ligand 1           | 1 | 0.32 | 0.76  | 0.39  | 1.63 | 0.42 | No  | No  | No  |
| Cxcl5  | C-X-C Motif Chemokine Ligand 5         | 1 | 0.30 | 0.29  | 0.07  | 1.32 | 0.24 | No  | No  | Yes |
| Spp1   | Secreted Phosphoprotein 1              | 1 | 0.30 | 36.42 | 15.78 | 6.12 | 1.75 | No  | Yes | No  |
| Il1rn  | Interleukin 1 Receptor Antagonist      | 1 | 0.12 | 15.31 | 1.83  | 2.42 | 0.35 | Yes | Yes | Yes |

| iWAT   |                                 |             |      |                      |      |                      |      |              |                 |               |
|--------|---------------------------------|-------------|------|----------------------|------|----------------------|------|--------------|-----------------|---------------|
|        |                                 | Young       |      | Old                  |      | Old-DR               |      | Significance | Significance    | Significance  |
| Gene   | Gene Name                       | Fold change | SEM  | Fold change vs young | SEM  | Fold change vs young | SEM  | Young vs Old | Young vs Old-DR | Old vs Old-DR |
| Il12a  | Interleukin 12a                 | 1           | 0.48 | 0.10                 | 0.05 | 0.21                 | 0.08 | No           | No              | No            |
| Mstn   | Myostatin                       | 1           | 0.30 | 0.02                 | 0.01 | 0.09                 | 0.04 | No           | No              | No            |
| ccl1   | C-C Motif Chemokine Ligand 1    | 1           | 0.29 | 1.42                 | 0.99 | 0.56                 | 0.21 | No           | No              | No            |
| Fasl   | Fas Ligand                      | 1           | 0.17 | 1.03                 | 0.57 | 0.66                 | 0.23 | No           | No              | No            |
| Cd40lg | CD40 Ligand                     | 1           | 0.30 | 0.53                 | 0.32 | 0.14                 | 0.06 | No           | No              | No            |
| Cxcl10 | C-X-C Motif Chemokine Ligand 10 | 1           | 0.54 | 1.33                 | 0.96 | 0.17                 | 0.02 | No           | No              | No            |
| Xcl1   | X-C Motif Chemokine Ligand 1    | 1           | 0.57 | 0.90                 | 0.42 | 0.17                 | 0.05 | No           | No              | No            |
| Il16   | Interleukin 16                  | 1           | 0.22 | 3.40                 | 0.86 | 1.37                 | 0.44 | No           | No              | No            |
| Ccl17  | C-C Motif Chemokine Ligand 17   | 1           | 0.52 | 4.09                 | 1.07 | 1.47                 | 0.61 | Yes          | No              | No            |
| Cx3Cl1 | C-X3-C Motif Chemokine Ligand 1 | 1           | 0.33 | 7.75                 | 2.92 | 0.56                 | 0.14 | No           | No              | No            |
| Il7    | Interleukin 7                   | 1           | 0.25 | 5.23                 | 1.58 | 0.67                 | 0.19 | No           | No              | No            |
| Hc     | Hemolytic complement            | 1           | 0.29 | 4.50                 | 1.59 | 0.21                 | 0.03 | No           | No              | No            |
| Ppbp   | Pro-Platelet Basic Protein      | 1           | 0.26 | 2.19                 | 0.32 | 1.10                 | 0.44 | Yes          | No              | No            |
| Cxcl12 | C-X-C Motif Chemokine Ligand 12 | 1           | 0.15 | 3.59                 | 1.35 | 0.63                 | 0.11 | No           | No              | No            |
| Il18   | Interleukin 18                  | 1           | 0.19 | 3.00                 | 0.54 | 0.60                 | 0.14 | Yes          | No              | Yes           |
| Il15   | Interleukin 15                  | 1           | 0.27 | 1.89                 | 0.34 | 0.59                 | 0.06 | No           | No              | Yes           |
| Ccl2   | C-C Motif Chemokine Ligand 2    | 1           | 0.26 | 1.62                 | 0.46 | 0.64                 | 0.14 | No           | No              | No            |
| Il4    | Interleukin 4                   | 1           | 0.17 | 1.46                 | 0.58 | 0.61                 | 0.11 | No           | No              | No            |
| Cxcl13 | C-X-C Motif Chemokine Ligand 13 | 1           | 0.28 | 3.37                 | 1.06 | 0.70                 | 0.13 | No           | No              | No            |
| Il27   | Interleukin 27                  | 1           | 0.55 | 1.77                 | 0.79 | 0.79                 | 0.20 | No           | No              | No            |
| Il6    | Interleukin 6                   | 1           | 0.39 | 1.34                 | 0.58 | 0.82                 | 0.30 | No           | No              | No            |

|          |                                 |   |      |      |      |      |      |    |     |     |
|----------|---------------------------------|---|------|------|------|------|------|----|-----|-----|
| Cxcl16   | C-X-C Motif Chemokine Ligand 16 | 1 | 0.76 | 1.85 | 0.49 | 0.28 | 0.05 | No | No  | No  |
| Ccl7     | C-C Motif Chemokine Ligand 7    | 1 | 0.27 | 1.12 | 0.43 | 0.36 | 0.16 | No | No  | No  |
| Ccl3     | C-C Motif Chemokine Ligand 3    | 1 | 0.29 | 1.13 | 0.22 | 0.30 | 0.08 | No | No  | No  |
| Ccl5     | C-C Motif Chemokine Ligand 5    | 1 | 0.20 | 0.91 | 0.55 | 0.61 | 0.29 | No | No  | No  |
| Tnfsf13b | TNF Superfamily Member 13b      | 1 | 0.40 | 1.53 | 0.59 | 0.39 | 0.17 | No | No  | No  |
| IL10     | Interleukin 10                  | 1 | 0.29 | 1.12 | 0.23 | 0.52 | 0.09 | No | No  | No  |
| Cntf     | Ciliary Neurotrophic Factor     | 1 | 0.30 | 0.95 | 0.10 | 0.57 | 0.14 | No | No  | No  |
| Ccl12    | C-C Motif Chemokine Ligand 12   | 1 | 0.44 | 1.36 | 0.57 | 0.42 | 0.04 | No | No  | No  |
| Ccl4     | C-C Motif Chemokine Ligand4     | 1 | 0.49 | 0.87 | 0.22 | 0.39 | 0.12 | No | No  | No  |
| Tnf      | Tumor Necrosis Factor           | 1 | 0.32 | 2.54 | 1.13 | 1.08 | 0.24 | No | No  | No  |
| Ccl19    | C-C Motif Chemokine Ligand 19   | 1 | 0.16 | 1.29 | 0.29 | 1.13 | 0.30 | No | No  | No  |
| Ccl11    | C-C Motif Chemokine Ligand 11   | 1 | 0.08 | 1.44 | 0.29 | 0.75 | 0.07 | No | No  | No  |
| Csf1     | Colony Stimulating Factor 1     | 1 | 0.07 | 1.59 | 0.11 | 0.56 | 0.13 | No | Yes | Yes |
| Ccl22    | C-C Motif Chemokine Ligand 22   | 1 | 0.25 | 1.96 | 0.44 | 0.62 | 0.20 | No | No  | Yes |
| Pf4      | Platelet Factor 4               | 1 | 0.34 | 2.16 | 0.69 | 1.04 | 0.28 | No | No  | No  |
| Cxcl11   | C-X-C Motif Chemokine Ligand 11 | 1 | 0.42 | 1.10 | 0.13 | 1.18 | 0.34 | No | No  | No  |
| Ccl24    | C-C Motif Chemokine Ligand 24   | 1 | 0.23 | 0.92 | 0.36 | 0.81 | 0.19 | No | No  | No  |
| Tnfsf11  | TNF Superfamily Member 11       | 1 | 0.34 | 0.89 | 0.33 | 0.91 | 0.25 | No | No  | No  |
| Ltb      | Lymphotoxin Beta                | 1 | 0.18 | 1.21 | 0.40 | 1.29 | 0.31 | No | No  | No  |
| Tnfsf10  | TNF Superfamily Member 10       | 1 | 0.12 | 0.84 | 0.16 | 1.05 | 0.20 | No | No  | No  |
| Cxcl1    | C-X-C Motif Chemokine Ligand 1  | 1 | 0.16 | 0.88 | 0.31 | 1.26 | 0.43 | No | No  | No  |

|       |                                        |   |      |      |      |      |      |     |     |     |
|-------|----------------------------------------|---|------|------|------|------|------|-----|-----|-----|
| Gpi1  | Glucose-6-Phosphate Isomerase 1        | 1 | 0.07 | 0.37 | 0.05 | 1.00 | 0.14 | Yes | No  | Yes |
| Il17f | Interleukin 17f                        | 1 | 0.13 | 0.27 | 0.05 | 1.39 | 0.20 | Yes | No  | Yes |
| Mif   | Macrophage Migration Inhibitory Factor | 1 | 0.10 | 0.70 | 0.24 | 0.75 | 0.16 | No  | No  | No  |
| Cxcl9 | C-X-C Motif Chemokine Ligand 9         | 1 | 0.17 | 0.50 | 0.14 | 0.64 | 0.10 | Yes | No  | No  |
| Ctfl  | Cardiotrophin 1                        | 1 | 0.20 | 0.80 | 0.24 | 0.52 | 0.08 | No  | No  | No  |
| Vgefa | Vascular Endothelial Growth Factor A   | 1 | 0.05 | 0.71 | 0.15 | 0.45 | 0.13 | No  | No  | No  |
| Il11  | Interleukin 11                         | 1 | 0.34 | 0.79 | 0.30 | 0.34 | 0.08 | No  | No  | No  |
| Spp1  | Secreted Phosphoprotein 1              | 1 | 0.19 | 1.17 | 0.84 | 0.83 | 0.12 | No  | No  | No  |
| Thpo  | Thrombopoietin                         | 1 | 0.14 | 0.36 | 0.06 | 0.60 | 0.09 | Yes | Yes | No  |
| Tgfb2 | Transforming Growth Factor Beta 2      | 1 | 0.38 | 0.60 | 0.15 | 0.47 | 0.09 | No  | No  | No  |
